# Supplementary material
Source: MDPI journal article supplement (https://www.mdpi.com/2297-8739/8/11/211)
Supplement: s1 [file s1]

## Supporting information

Figure. S1 FT-IR spectra of 2

Figure. S2  $^1\text{H}$ -NMR spectra of 2

Figure. S3  $^{13}\text{C}$ -NMR spectra of 2

Figure. S4 FT-IR spectra of 5

Figure. S5  $^1\text{H}$ -NMR spectra of 5

Figure. S6  $^{13}\text{C}$ -NMR spectra of 5

Figure. S7 Effect of equilibrium pH on extraction percentage of Al (triangle), Ga (square), and In (circle) with carboxylic acid type of commercially available extraction reagent, neodecanoic acid (trade name Versatic acid 10, 150 mM in  $\text{CHCl}_3$ ).

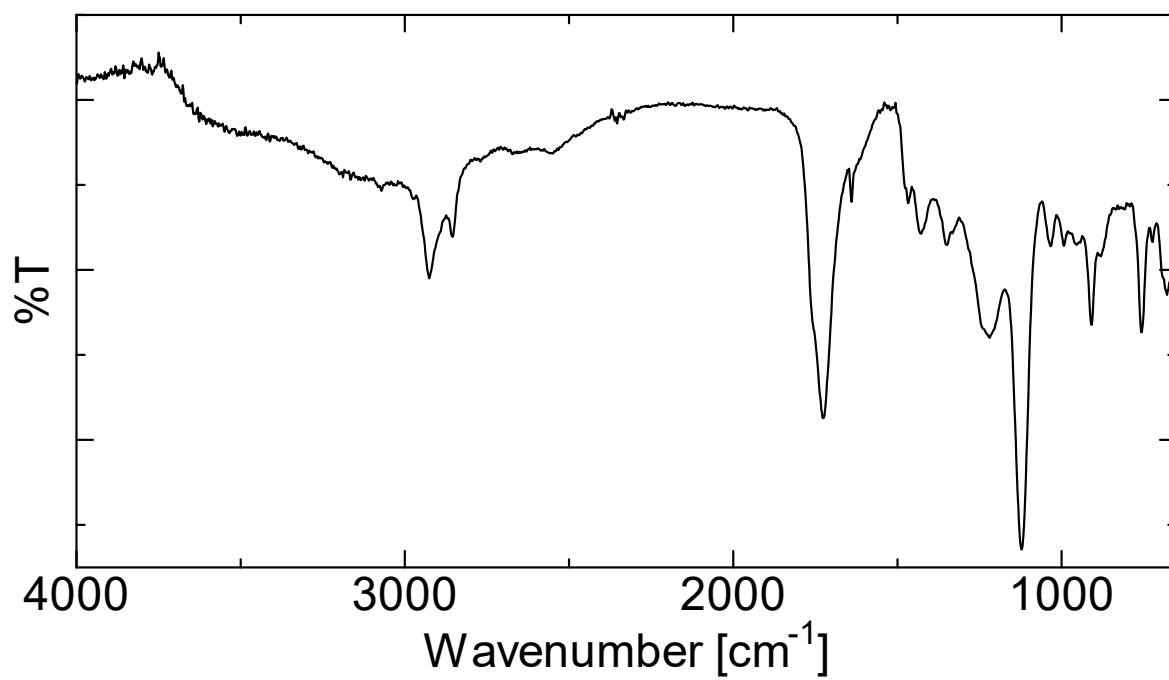

Figure. S1 FT-IR spectra of **2**

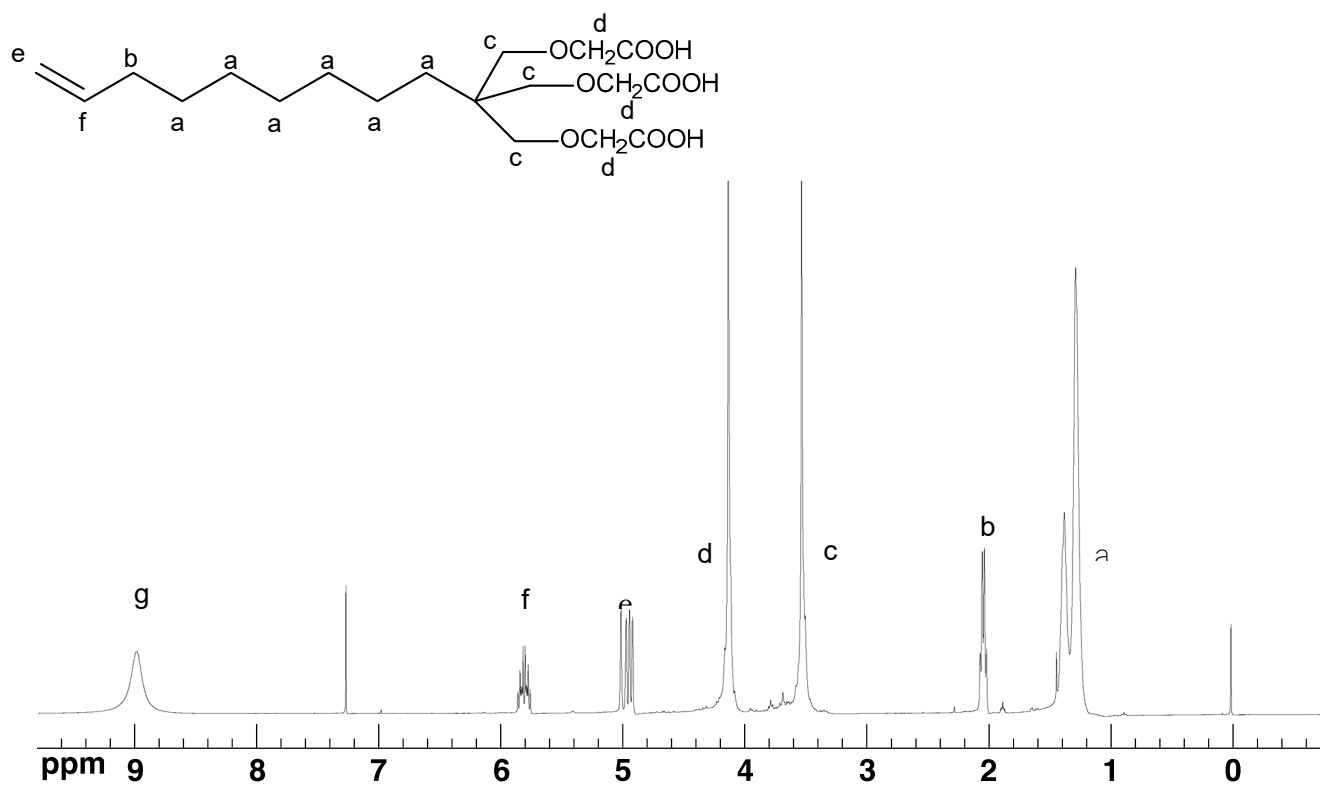

Figure. S2 <sup>1</sup>H-NMR spectra of **2**

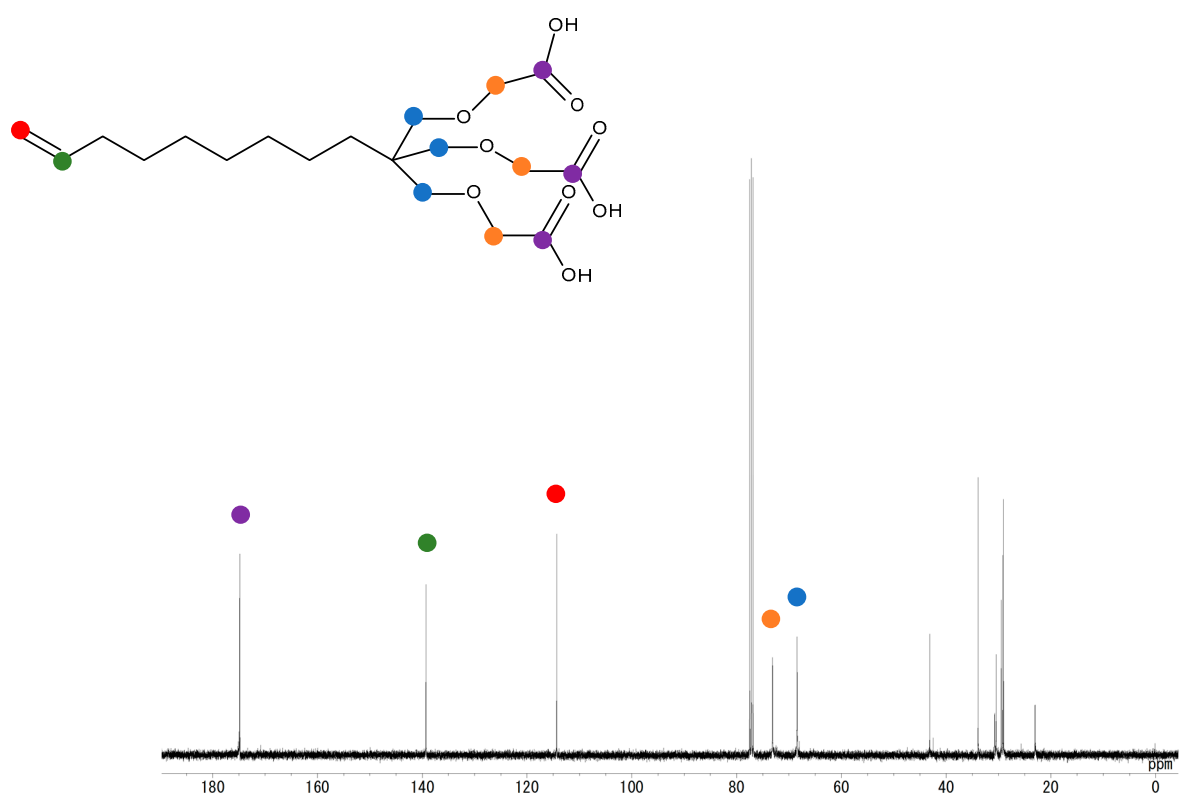

Figure. S3  $^{13}\text{C}$ -NMR spectra of **2**

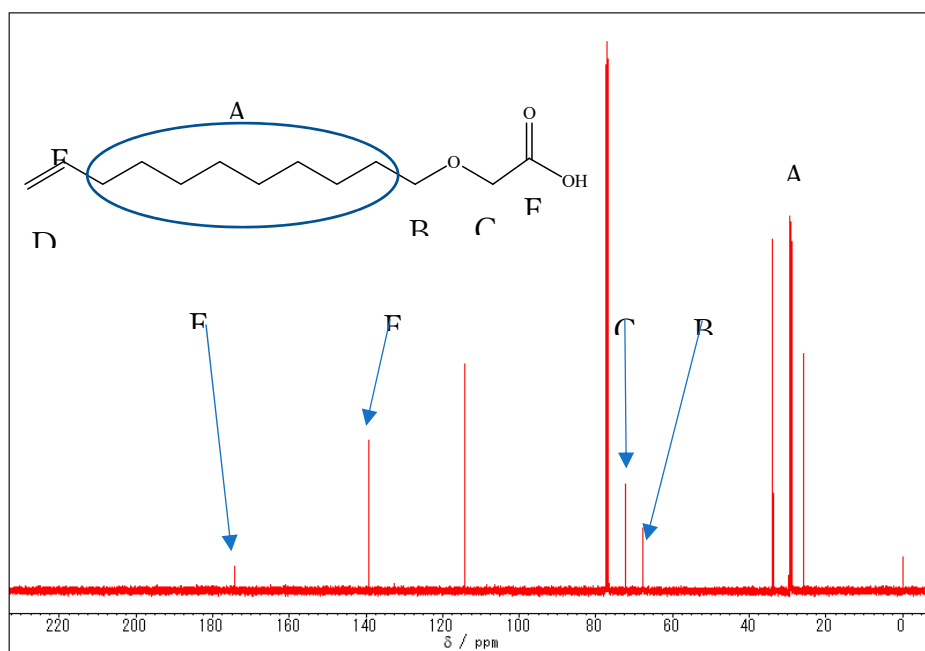

Figure. S4 FT-IR spectra of **5**

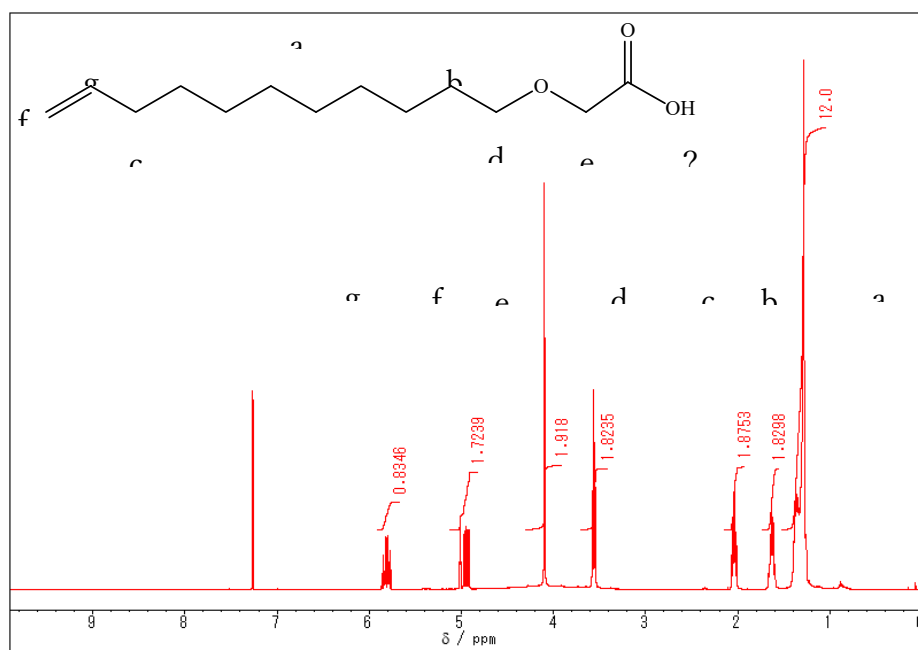

Figure. S5 <sup>1</sup>H-NMR spectra of **5**

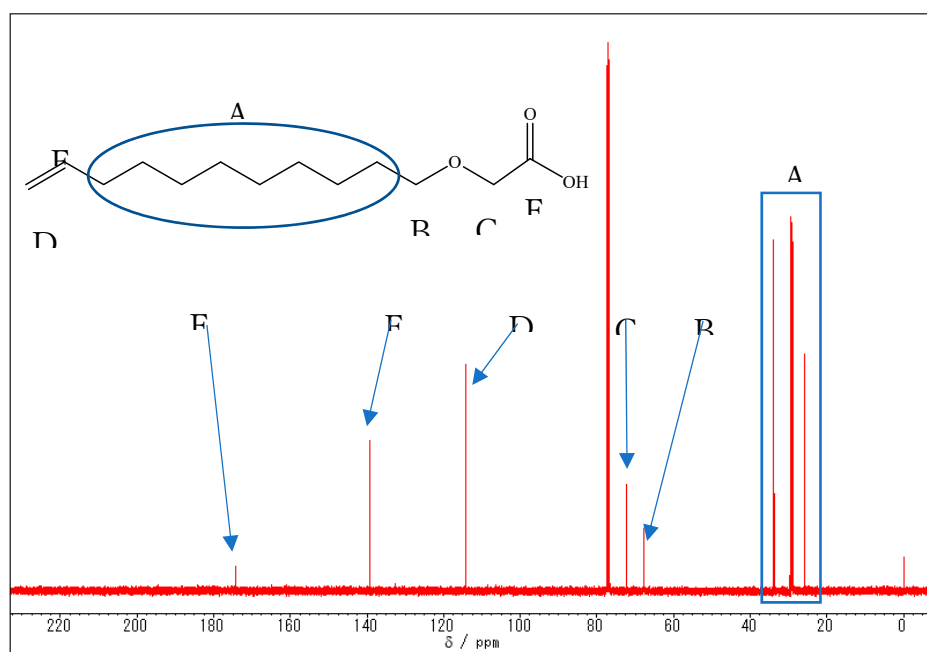

Figure. S6 <sup>13</sup>C-NMR spectra of **5**

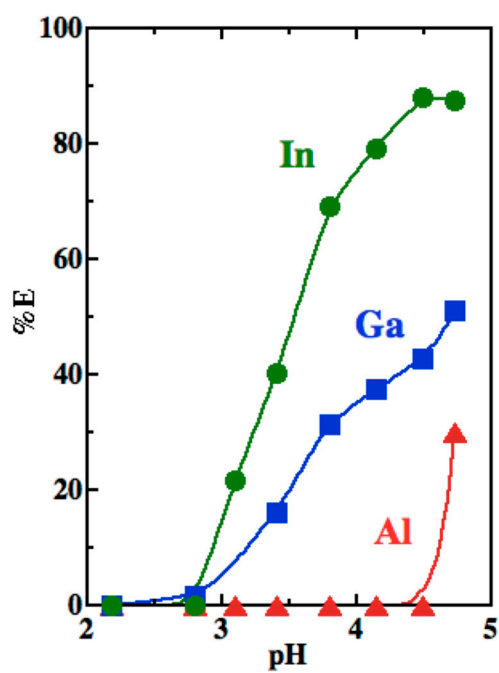

Figure. S7 Effect of equilibrium pH on extraction percentage of Al (triangle), Ga (square), and In (circle) with carboxylic acid type of commercially available extraction reagent, neodecanoic acid (trade name Versatic acid 10, 150 mM in  $\text{CHCl}_3$ ).
